# Supplementary material for: Effect of composition and architecture on the thermodynamic behavior of AuCu nanoparticles
Source: Royal Society of Chemistry journal article supplement (doi:10.1039/d4nr01778a), 2024-01-01
Supplement: d4nr01778a1.pdf [file d4nr01778a1.pdf]

## SUPPORTING INFORMATION

### Effect of composition and architecture on the thermodynamic behavior of AuCu nanoparticles

Wei-Hua Yang, Fang-Qi Yu, Rao Huang,\* Yu-Xing Lin, and Yu-Hua Wen\*

*Department of Physics, Xiamen University, Xiamen 361005, China*

\*Correspondence should be addressed to Y. H. W. (yhwen@xmu.edu.cn), and R. H. (huangrao@xmu.edu.cn).

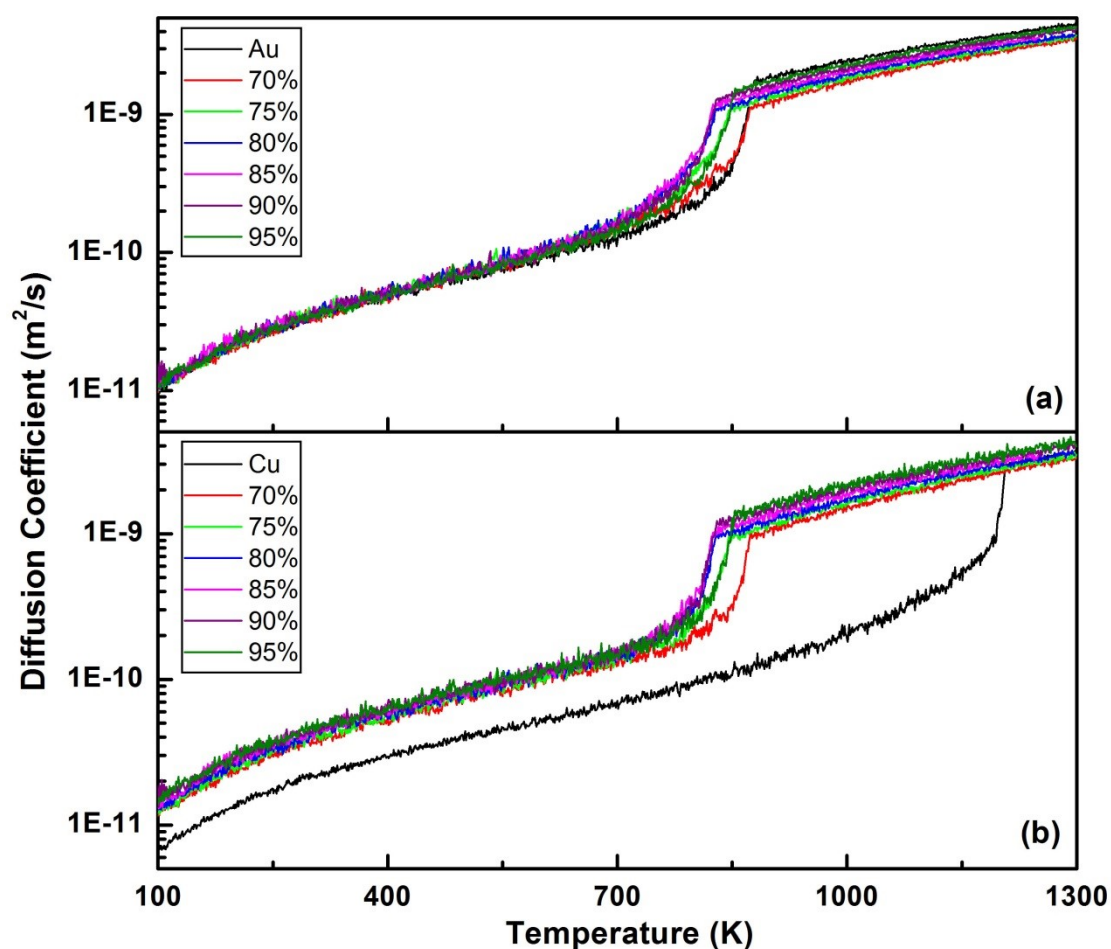

**Fig. S1** Temperature-dependent diffusion coefficients of (a) Au atoms in Au and AuCu chemically disordered alloy nanoparticles and Cu atoms in Cu and AuCu chemically disordered alloy nanoparticles.

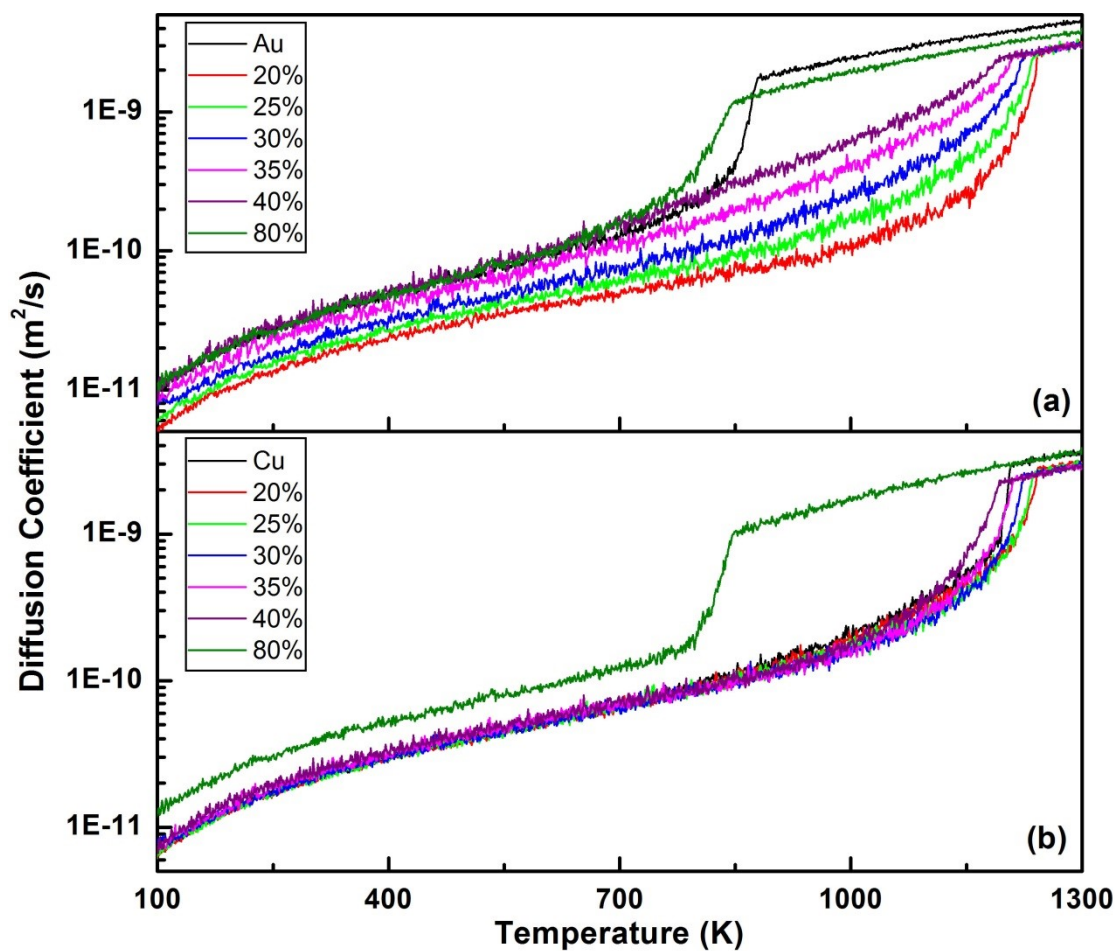

**Fig. S2** Temperature-dependent diffusion coefficients of (a) Au atoms in Au and AuCu chemically ordered alloy nanoparticles and Cu atoms in Cu and AuCu chemically ordered alloy nanoparticles.

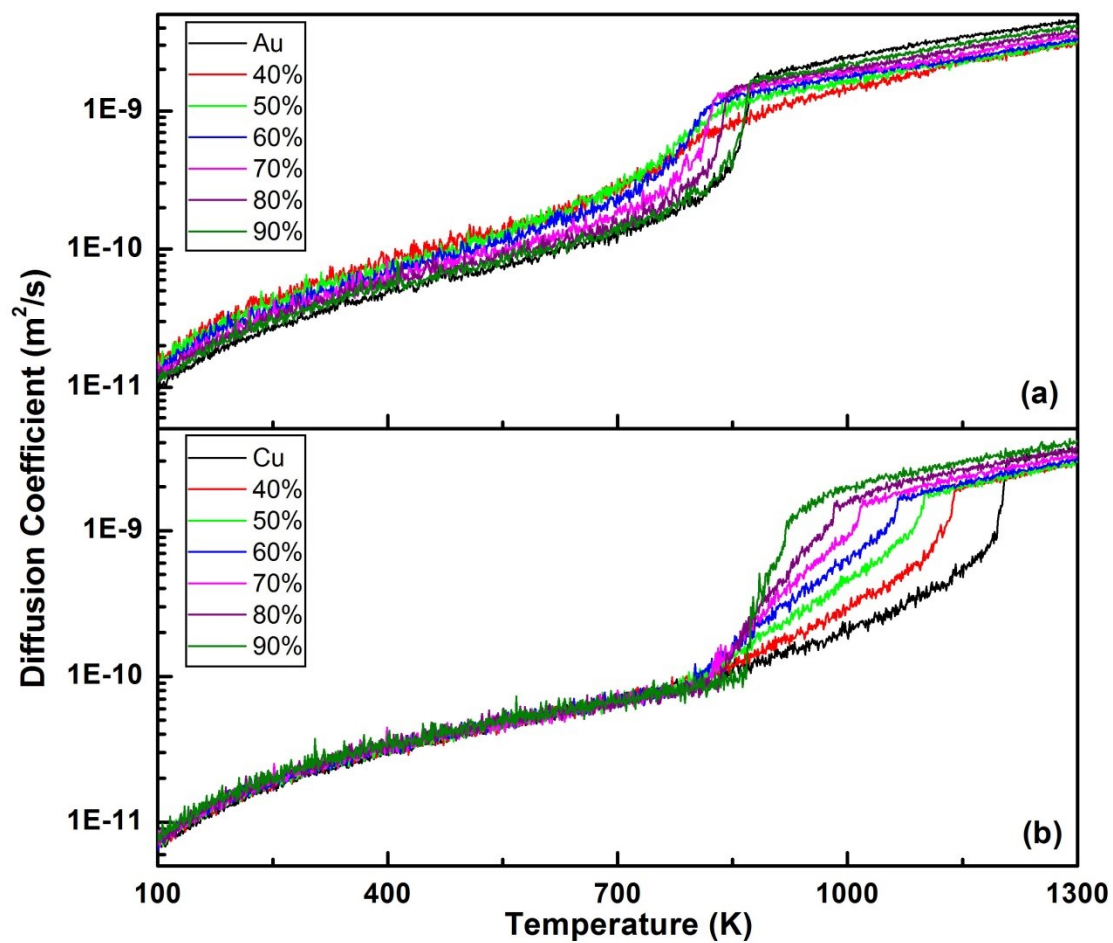

**Fig. S3** Temperature-dependent diffusion coefficients of (a) Au atoms in Au and Cu@Au nanoparticles and Cu atoms in Cu and Cu@Au nanoparticles.

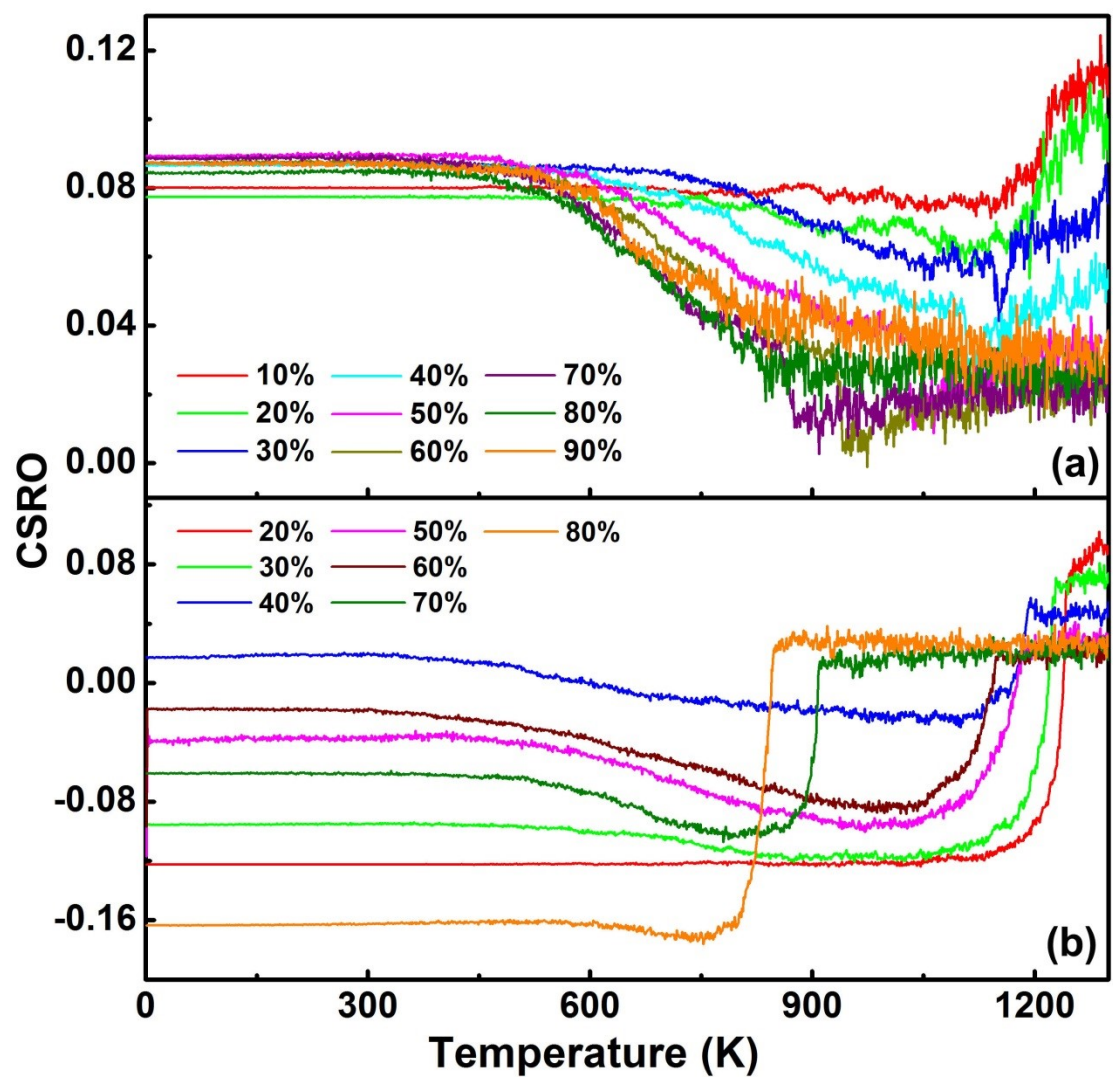

**Fig. S4** Chemical short-range order (CSRO) parameters as a function of temperature for (a) chemically disordered and (b) chemically ordered alloy AuCu nanoparticles with different Au contents.

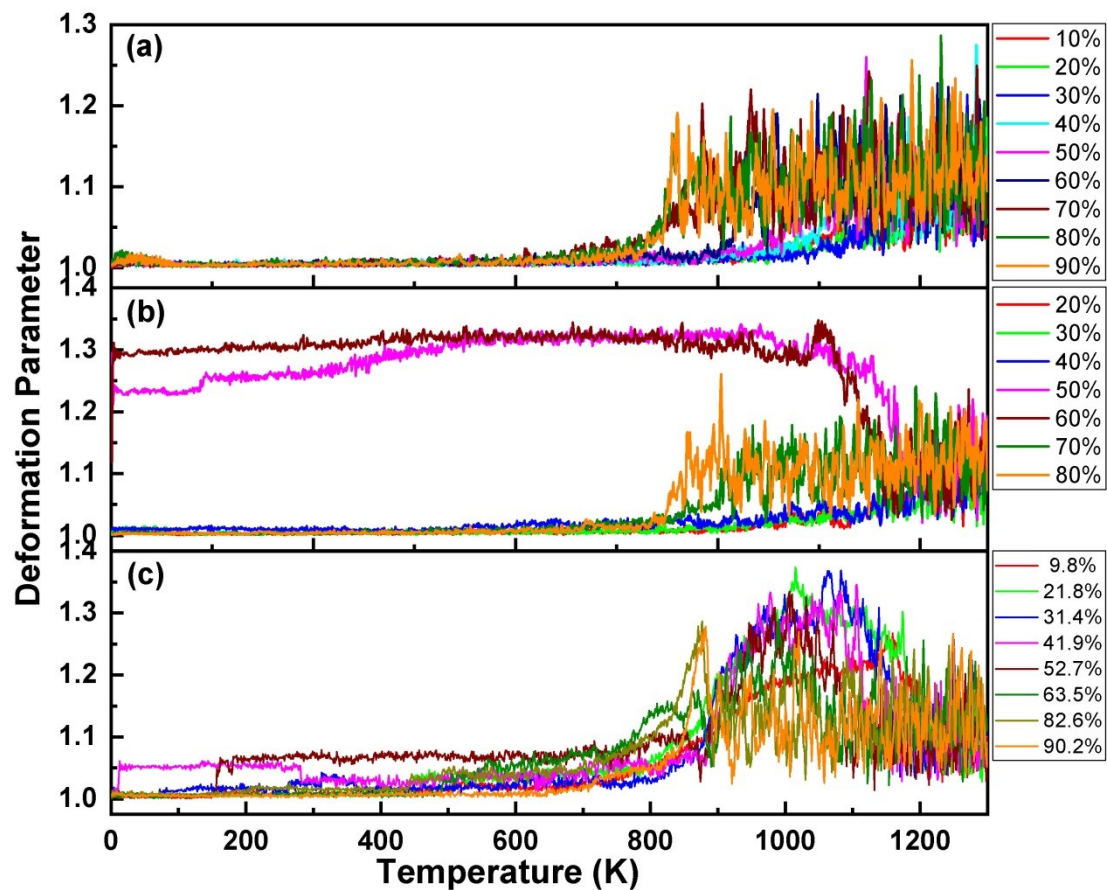

**Fig. S5** Temperature-dependent deformation parameters of (a) chemically disordered alloy, (b) chemically ordered alloy, and (c) heterostructured AuCu nanoparticles with different Au contents.
